# Supplementary material
Source: MDPI journal article supplement (https://www.mdpi.com/1996-1073/14/13/3911)
Supplement: s1 [file s1]

### Supplementary Materials

Equation (36) after substituting in it (35) and  $x_g = x$ , we obtain

$$z = \frac{1}{\rho_0} [n(J_3 + CJ_2) - m(J_2 + CJ_1)] \quad (S1)$$

or

$$z = \frac{1}{\rho_0} [nJ_3 - mCJ_1 + (nC - m)J_2] \quad (S2)$$

where:

$$J_1 = \int_0^1 \frac{x^2}{1 + Cx^2} dx = \frac{1}{C} \left( 1 - \frac{\arctg \sqrt{C}}{\sqrt{C}} \right) \quad (S3)$$

$$J_2 = \int_0^1 \frac{x}{1 + Cx^2} dx = \frac{\ln(1 + C)}{2C} \quad (S4)$$

$$J_3 = \int_0^1 \frac{dx}{1 + Cx^2} = \frac{\arctg \sqrt{C}}{\sqrt{C}} \quad (S5)$$

By substituting for Equation (S2) of the solutions of integrals (S3) to (S5) after ordering, we obtain Equation (37).
